# Supplementary material for: Real-Life Study of the Benefit of Concomitant Radiotherapy with Cemiplimab in Advanced Cutaneous Squamous Cell Carcinoma (cSCC): A Retrospective Cohort Study
Source: MDPI journal article supplement (doi:10.3390/cancers15020495), 2023-01-13
Supplement: s1 [file s1]

**Table S1:** Baseline characteristics per patient (part 1).

| Patient | Group | Age (years) | Gender | ECOG Status | previous cScc (y/n) | Immuno depression (y/n) | Lymphopenia (y/n) | Staging | Site of metastasis | Site of primary tumour | size (mm) | previous lines of treatment | previous RT (Y/N) |
|---------|-------|-------------|--------|-------------|---------------------|-------------------------|-------------------|---------|--------------------|------------------------|-----------|-----------------------------|-------------------|
| 1       | C     | 74          | M      | 2           | yes                 | yes                     | yes               | LacScc  |                    | face                   | 20        | no                          | no                |
| 2       | C/RT  | 83          | M      | 2           | no                  | no                      | no                | mcScc   | LocoR              | face                   | 38        | no                          | no                |
| 3       | C/RT  | 88          | M      | 1           | yes                 | yes                     | no                | mcScc   | LocoR              | cervical               | 30        | no                          | no                |
| 4       | C     | 81          | F      | 2           | no                  | no                      | yes               | mcScc   | LocoR              | face                   |           | no                          | yes               |
| 5       | C/RT  | 89          | M      | 2           | yes                 | no                      | no                | mcScc   | LocoR              | cervical               |           | no                          | no                |
| 6       | C     | 86          | M      | 1           | yes                 | no                      | yes               | mcScc   | Distant            | arm or leg             | 34        | no                          | yes               |
| 7       | C     | 75          | M      | 1           | yes                 | no                      | yes               | mcScc   | LocoR              | scalp                  | 20        | no                          | yes               |
| 8       | C     | 79          | M      | 2           | yes                 | no                      | no                | mcScc   | Distant            | face                   | 6         | no                          | no                |
| 9       | C     | 76          | M      | 2           | no                  | no                      | no                | mcScc   | LocoR              | face                   | 90        | no                          | no                |
| 10      | C/RT  | 89          | F      | 2           | no                  | no                      | yes               | mcScc   | LocoR              | arm or leg             | 22        | no                          | yes               |
| 11      | C     | 80          | M      | 2           | yes                 | no                      | no                | mcScc   | Distant            | face                   |           | no                          | yes               |
| 12      | C     | 76          | M      | 3           | yes                 | no                      | no                | mcScc   | Distant            | face                   | 50        | yes                         | yes               |
| 13      | C/RT  | 87          | M      | 1           | yes                 | yes                     | no                | mcScc   | LocoR              | face                   |           | no                          | no                |
| 14      | C     | 69          | M      | 1           | no                  | yes                     | no                | mcScc   | LocoR              | face                   | 40        | no                          | no                |
| 15      | C/RT  | 78          | M      | 1           | yes                 | yes                     | yes               | mcScc   | LocoR              | face                   | 60        | no                          | no                |

|    |      |    |   |   |     |     |     |        |         |            |     |     |     |
|----|------|----|---|---|-----|-----|-----|--------|---------|------------|-----|-----|-----|
| 16 | C    | 81 | F | 2 | no  | no  | no  | mcScc  | LocoR   | face       |     | no  | no  |
| 17 | C    | 67 | M | 2 | yes | yes | yes | mcScc  | LocoR   | face       |     | no  | yes |
| 18 | C    | 81 | M | 2 | yes | no  | no  | mcScc  | LocoR   | face       | 40  | no  | yes |
| 19 | C    | 40 | M | 0 | no  | no  | no  | mcScc  | LocoR   | trunk      |     | no  | no  |
| 20 | C    | 47 | F | 1 | no  | no  | no  | mcScc  | Distant | face       |     | yes | yes |
| 21 | C/RT | 51 | M | 1 | no  | no  | no  | mcScc  | Distant | arm or leg |     | yes | no  |
| 22 | C    | 81 | M | 1 | no  | no  | yes | mcScc  | Distant | trunk      |     | no  | yes |
| 23 | C    | 80 | M | 1 | no  | no  | no  | mcScc  | LocoR   | face       | 40  | no  | no  |
| 24 | C/RT | 64 | M | 1 | no  | yes | yes | mcScc  | Distant | face       | 30  | no  | no  |
| 25 | C/RT | 73 | M | 0 | no  | no  | no  | LacScc |         | face       | 20  | no  | no  |
| 26 | C    | 90 | M | 2 | yes | no  | no  | mcScc  | LocoR   | face       | 14  | no  | yes |
| 27 | C/RT | 62 | M | 1 | no  | no  | yes | mcScc  | Distant | arm or leg | 65  | no  | no  |
| 28 | C    | 76 | M | 0 | yes | no  | no  | mcScc  | Distant | face       | 9   | no  | yes |
| 29 | C    | 84 | F | 1 | yes | yes | yes | mcScc  | LocoR   | face       |     | no  | yes |
| 30 | C    | 82 | M | 1 | yes | no  | no  | LacScc |         | face       | 27  | no  | yes |
| 31 | C/RT | 76 | M | 2 | yes | no  | no  | mcScc  | Distant | trunk      | 120 | no  | no  |
| 32 | C    | 73 | M | 2 | yes | yes | no  | LacScc |         | scalp      | 70  | no  | yes |
| 33 | C/RT | 87 | M | 1 | yes | no  | yes | mcScc  | LocoR   | face       |     | no  | no  |

Baselines characteristics per patient (part 2)

| Patient | degree of differentiation | PNI (y/n) | Bone erosion (y/n) | Invasion beyond subcutaneous fat (y/n) | Dose of cemiplimab | Intent of RT | Site of RT: primary tumour or metastasis | Site of RT                       | Dose/fraction (Gy) | Nb of fraction | Prescribed dose (Gy) | BED (Gy) |
|---------|---------------------------|-----------|--------------------|----------------------------------------|--------------------|--------------|------------------------------------------|----------------------------------|--------------------|----------------|----------------------|----------|
| 1       | well                      |           | no                 |                                        | 3mg/kg/2w          |              |                                          |                                  |                    |                |                      |          |
| 2       | well                      |           | no                 |                                        | 350 mg/3w          | curative     | metastasis                               | Cervical lymph nodes and parotid | 3                  |                | 69                   | 89.7     |
| 3       | moderate                  |           | yes                |                                        | 350 mg/3w          | palliative   | metastasis                               | Cervical lymph nodes             | 6                  |                | 36                   | 57.6     |
| 4       | moderate                  | no        | no                 | no                                     | 350 mg/3w          |              |                                          |                                  |                    |                |                      |          |
| 5       | poor                      |           | no                 |                                        | 350 mg/3w          | curative     | metastasis                               | Parotid                          | 6                  |                | 12                   | 19.2     |
| 6       | well                      | no        | yes                | no                                     | 350 mg/3w          |              |                                          |                                  |                    |                |                      |          |
| 7       | moderate                  | yes       | yes                | yes                                    | 3mg/kg/2w          |              |                                          |                                  |                    |                |                      |          |
| 8       | well                      |           |                    |                                        | 350 mg/3w          |              |                                          |                                  |                    |                |                      |          |
| 9       |                           |           |                    |                                        | 350 mg/3w          |              |                                          |                                  |                    |                |                      |          |
| 10      | poor                      |           | no                 | no                                     | 35 mg/3w           | palliative   | metastasis                               | Axillary node                    | 6                  |                | 36                   | 57.6     |
| 11      | well                      |           |                    |                                        | 350 mg/3w          |              |                                          |                                  |                    |                |                      |          |
| 12      |                           |           | yes                |                                        | 350 mg/3w          |              |                                          |                                  |                    |                |                      |          |
| 13      | moderate                  |           |                    |                                        | 350 mg/3w          | palliative   | metastasis                               | Cervical lymph nodes             | 6                  |                | 18                   | 28.8     |
| 14      | well                      |           | no                 | yes                                    | both#              |              |                                          |                                  |                    |                |                      |          |

|    |          |     |     |     |            |          |                   |                                                  |            |          |              |               |
|----|----------|-----|-----|-----|------------|----------|-------------------|--------------------------------------------------|------------|----------|--------------|---------------|
| 15 | well     | no  | no  | no  | 350 mg/3 w | curative | metastasis \$     | 1.Cervical lymph nodes<br>2.Cervical lymph nodes | 3<br>3     | 15<br>21 | 45<br>63     | 58.5<br>81.9  |
| 16 | well     | no  | no  | no  | 3mg/kg/2 w |          |                   |                                                  |            |          |              |               |
| 17 | poor     |     | yes |     | 350 mg/3 w |          |                   |                                                  |            |          |              |               |
| 18 | moderate | yes | no  | yes | 350 mg/3 w |          |                   |                                                  |            |          |              |               |
| 19 | well     |     | no  | yes | 3mg/kg/2 w |          |                   |                                                  |            |          |              |               |
| 20 | well     |     |     |     | 350 mg/3 w |          |                   |                                                  |            |          |              |               |
| 21 | well     |     |     |     | 350 mg/3 w | curative | Metastasis \$     | 1.Inguinal nodes<br>2.Subcutaneous nodule        | 2<br>6     | 35<br>7  | 70<br>42     | 84<br>67.2    |
| 22 |          |     |     |     | 350 mg/3 w |          |                   |                                                  |            |          |              |               |
| 23 | well     | no  | no  | no  | 350 mg/3 w |          |                   |                                                  |            |          |              |               |
| 24 | poor     | no  | no  | yes | 350 mg/3 w | curative | Metastasis \$     | 1.Cervical lymph nodes<br>2. hepatic             | 2.4<br>2.4 | 29<br>24 | 69.6<br>57.6 | 86.3<br>71.4  |
| 25 | well     | no  | no  | yes | 350 mg/3 w | curative | Primary tumour \$ | 1.Primary tumour<br>2.Primary tumour             | 1.8<br>2   | 35<br>35 | 63<br>70     | 74.3<br>84    |
| 26 | moderate | yes | no  | no  | 350 mg/3 w |          |                   |                                                  |            |          |              |               |
| 27 | moderate | no  | no  | yes | 350 mg/3 w | curative | Metastasis \$     | 1.Inguinal nodes<br>2.Sternum                    | 6<br>3.7   | 2<br>8   | 12<br>29.6   | 19.2<br>40.55 |

|    |          |    |     |     |           |            |                |                |   |    |    |      |
|----|----------|----|-----|-----|-----------|------------|----------------|----------------|---|----|----|------|
| 28 | moderate | no | no  | no  | 350 mg/3w |            |                |                |   |    |    |      |
| 29 | poor     |    | no  | yes | Both#     |            |                |                |   |    |    |      |
| 30 | moderate | no | yes | yes | 350 mg/3w |            |                |                |   |    |    |      |
| 31 | moderate | no | no  | yes | 350 mg/3w | palliative | primary tumour | Primary tumour | 6 | 2  | 12 | 19,2 |
| 32 |          |    |     |     | 3mg/kg/2w |            |                |                |   |    |    |      |
| 33 | well     |    |     |     | 350 mg/3w | curative   | metastases     | parotid        | 3 | 23 | 69 | 89,7 |

C: cemiplimab group; C/RT: cemiplimab/radiotherapy group; CSCC: cutaneous squamous cell carcinoma; LacScc: locally advanced cScc; mcScc: metastatic cScc; LocoR: locoregional; w: weeks; Gy : grey; BED: biologically effective dose. #: patients who received the two dosages; \$ patients who received two radiotherapy sequences.

**Table S2:** Results per patient.

| Patient | Group | BO R | DC R (y/n) | Time of follow-up (months) | Time of TTT (months) | Nb of cemiplimab session (n=) | Time to response (months) | Event palliative care or death (y/n) | Positive clinical effect of RT (y/n) | Reason for discontinuation of cemiplimab | Disease status at cessation of cemiplimab | AE of cemiplimab (grade 0 to 5) | AE (type)           | time to onset of AE (months) | AE (RT) (grade 0 to 5) |
|---------|-------|------|------------|----------------------------|----------------------|-------------------------------|---------------------------|--------------------------------------|--------------------------------------|------------------------------------------|-------------------------------------------|---------------------------------|---------------------|------------------------------|------------------------|
| 1       | C     | NE   |            | 4                          | 4                    | 8                             |                           | yes                                  |                                      | Palliative care decision or death        | NE                                        | 0                               |                     |                              |                        |
| 2       | C/RT  | CR   | yes        | 17                         | 17                   | 25                            | 3                         | no                                   | yes                                  | Loss of reimbursement for cemiplimab     | CR                                        | 2                               | Rash maculo-papular | 0,5                          | 2                      |
| 3       | C/RT  | SD   | no         | 9                          | 8                    | 13                            |                           | yes                                  | yes                                  | Palliative care decision or death        | PD                                        | 3                               | fatigue             | 8                            | 2                      |

|    |          |    |     |    |    |    |    |     |     |                                      |    |   |                        |   |   |
|----|----------|----|-----|----|----|----|----|-----|-----|--------------------------------------|----|---|------------------------|---|---|
| 4  | C        | PR | yes | 22 | 22 | 32 | 3  | no  |     | Loss of reimbursement for cemiplimab | PR | 0 | asymptomatic gastritis |   |   |
| 5  | C/R<br>T | CR | yes | 7  | 7  | 11 | 2  | no  | yes | Lost to follow-up                    | CR | 1 | colitis                | 3 | 0 |
| 6  | C        | PD |     | 4  | 3  | 5  |    | yes |     | Palliative care decision or death    | PD | 0 |                        |   |   |
| 7  | C        | CR | yes | 32 | 32 | 51 | 17 | no  |     | Loss of reimbursement for cemiplimab | CR | 3 | pancreatitis           | 7 |   |
| 8  | C        | NE |     | 2  | 0  | 2  |    | yes |     | Palliative care decision or death    | NE | 3 | Chronic kidney disease | 1 |   |
| 9  | C        | PD |     | 5  | 4  | 7  |    | yes |     | Palliative care decision or death    | PD | 0 |                        |   |   |
| 10 | C/R<br>T | SD | no  | 7  | 6  | 9  |    | yes | yes | Palliative care decision or death    | PD | 1 | Chronic kidney disease | 4 | 1 |
| 11 | C        | CR | yes | 14 | 14 | 18 | 5  | no  |     | Loss of reimbursement for cemiplimab | CR | 3 | hepatic cytolysis      | 2 |   |
| 12 | C        | NE |     | 1  | 0  | 1  |    | yes |     | Palliative care decision or death    | NE | 0 |                        |   |   |

|    |          |    |     |    |    |    |    |     |     |                                         |    |   |                |    |   |
|----|----------|----|-----|----|----|----|----|-----|-----|-----------------------------------------|----|---|----------------|----|---|
| 13 | C/R<br>T | NE |     | 1  | 1  | 1  |    | yes | yes | Palliative care decision<br>or death    | NE | 0 |                |    | 0 |
| 14 | C        | CR | yes | 34 | 34 | 60 | 15 | no  |     | Loss of reimbursement<br>for cemiplimab | CR | 2 | colitis        | 10 |   |
| 15 | C/R<br>T | CR | yes | 12 | 12 | 18 | 3  | no  | yes | Loss of reimbursement<br>for cemiplimab | CR | 0 |                |    | 1 |
| 16 | C        | NE |     | 0  | 0  | 1  |    | yes |     | Palliative care decision<br>or death    | NE | 0 |                |    |   |
| 17 | C        | PD |     | 5  | 4  | 7  |    | yes |     | Palliative care decision<br>or death    | PD | 0 |                |    |   |
| 18 | C        | CR | yes | 7  | 7  | 11 | 3  | no  |     | Loss of reimbursement<br>for cemiplimab | CR | 2 | hypothyroidism | 4  |   |
| 19 | C        | NE |     | 3  | 3  | 4  |    | yes |     | Palliative care decision<br>or death    | NE | 3 | fatigue        | 0  |   |
| 20 | C        | PD |     | 2  | 0  | 1  |    | yes |     | Palliative care decision<br>or death    | PD | 0 |                |    |   |
| 21 | C/R<br>T | PD |     | 9  | 3  | 4  |    | yes | yes | Palliative care decision<br>or death    | PD | 3 | pancytopenia   | 3  | 2 |
| 22 | C        | NE |     | 1  | 1  | 2  |    | no  |     | Lost to follow-up                       | NE | 0 |                |    |   |

|    |          |    |     |    |    |    |    |     |     |                                      |    |   |                              |    |   |
|----|----------|----|-----|----|----|----|----|-----|-----|--------------------------------------|----|---|------------------------------|----|---|
| 23 | C        | CR | yes | 20 | 20 | 29 | 3  | no  |     | Loss of reimbursement for cemiplimab | CR | 2 | asymptomatic lipase increase | 8  |   |
| 24 | C/R<br>T | PR | no  | 8  | 8  | 7  | 4  | no  | no  | Loss of reimbursement for cemiplimab | PD | 0 |                              |    | 1 |
| 25 | C/R<br>T | CR | yes | 10 | 10 | 15 | 3  | no  | yes | Loss of reimbursement for cemiplimab | CR | 1 | pruritus                     | 7  | 1 |
| 26 | C        | PR | no  | 9  | 7  | 17 | 3  | yes |     | Palliative care decision or death    | PD | 0 |                              |    |   |
| 27 | C/R<br>T | PD |     | 10 | 6  | 5  |    | yes | yes | Palliative care decision or death    | PD | 3 | hyperglycemia                | 3  | 0 |
| 28 | C        | CR | yes | 12 | 12 | 18 | 6  | no  |     | Loss of reimbursement for cemiplimab | CR | 1 | myalgia                      | 12 |   |
| 29 | C        | PR | yes | 33 | 33 | 53 | 14 | no  |     | Loss of reimbursement for cemiplimab | PR | 2 | myalgia                      | 17 |   |
| 30 | C        | PR | yes | 21 | 21 | 32 | 7  | no  |     | Loss of reimbursement for cemiplimab | PR | 1 | psoriasis                    | 10 |   |
| 31 | C/R<br>T | SD | no  | 7  | 4  | 5  |    | yes | no  | Palliative care decision or death    | PD | 0 |                              |    | 0 |



|    |          |    |     |   |   |    |  |     |                                      |                                         |    |                       |   |
|----|----------|----|-----|---|---|----|--|-----|--------------------------------------|-----------------------------------------|----|-----------------------|---|
| 32 | C        | SD | no  | 9 | 9 | 5  |  | yes | Palliative care decision<br>or death | PD                                      | 3  | gamma-GT<br>increased | 1 |
| 33 | C/R<br>T | SD | yes | 7 | 7 | 11 |  | no  | yes                                  | Loss of reimbursement<br>for cemiplimab | SD | 0                     | 1 |

BOR: best overall response; CR = complete response; PR = partial response; SD = stable disease; PD = progressive disease; NE = non evaluated; DCR: disease control rate; C: cemiplimab group; C/RT: cemiplimab/radiotherapy group; TTT: treatment; NB: number; RT: radiotherapy; AE: adverse event (gradation from 0 to 5).
